# Supplementary material
Source: Research Square preprint supplement (doi:10.21203/rs.3.rs-10069933/v1)
Supplement: Supplementary file 1 [file 328b454e4e6fcc02c5038752.pdf]

## Proof of Concept | SITE — Domain Selection from MAPS for Sierra Leone

| SABI Finding (Sierra Leone)                                                                                                                                                                                                                                                                                      | MAPS Domain                                      | Selection Rationale                                                                                                                                                                                                  | Interdependency                                                                                                                                                                                                                                                                                                                                                                                                                                                                                                                           |
|------------------------------------------------------------------------------------------------------------------------------------------------------------------------------------------------------------------------------------------------------------------------------------------------------------------|--------------------------------------------------|----------------------------------------------------------------------------------------------------------------------------------------------------------------------------------------------------------------------|-------------------------------------------------------------------------------------------------------------------------------------------------------------------------------------------------------------------------------------------------------------------------------------------------------------------------------------------------------------------------------------------------------------------------------------------------------------------------------------------------------------------------------------------|
| <ul style="list-style-type: none"> <li>No functional procurement system nationally</li> <li>Consumables sourced ad hoc from international donations</li> <li>Frequent stockouts halt fabrication regardless of infrastructure</li> </ul>                                                                         | <b>S</b><br><br><b>Supply Chain</b>              | Barrier interaction analysis showed supply chain failures reconstitute fabrication constraints even after infrastructure improvements. Cannot address infrastructure or technology without reliable material supply. | <p><b>These four domains form an interdependent set.</b></p> <p>Barrier interaction analysis confirmed that addressing any subset without the others reproduces the vicious cycles identified through SABI.</p> <p>Supply chain without infrastructure leaves fabrication constrained; infrastructure without workforce leaves facilities underutilized; workforce without appropriate technology produces clinicians without effective devices to fit.</p> <p><i>SITE formalized in the MIT-MOHS MOU, January 2023–January 2027.</i></p> |
| <ul style="list-style-type: none"> <li>Mean facility score 10.75/25 — all four facilities severely constrained</li> <li>Equipment functionality mean 1.25/5; fewer than 25% of tools operational</li> <li>Power available ~4-6 hrs/day at NRC; generator use fuel-constrained</li> </ul>                         | <b>I</b><br><br><b>Infrastructure</b>            | Physical facility conditions were the most acute bottleneck on production capacity. Workforce training and technology improvements cannot take effect in non-functional clinical environments.                       |                                                                                                                                                                                                                                                                                                                                                                                                                                                                                                                                           |
| <ul style="list-style-type: none"> <li>Gold-standard fabrication (carbon fiber, resin lamination) unavailable</li> <li>Thermoplastic substitution due to equipment failure — premature device breakdown</li> <li>No national prescribing guidelines; donated devices often contextually inappropriate</li> </ul> | <b>T</b><br><br><b>Technology</b>                | Device quality failures drove the vicious cycle of abandonment and reduced demand. Restoring appropriate technology is prerequisite to breaking the infrastructure-quality-demand spiral.                            |                                                                                                                                                                                                                                                                                                                                                                                                                                                                                                                                           |
| <ul style="list-style-type: none"> <li>1 Category I clinician nationally; 40-80x below WHO benchmark</li> <li>Caseload exceeded sustainable capacity; quality and follow-up compromised</li> <li>Cross-level cascade: financing gap → workforce gap → access failure</li> </ul>                                  | <b>E</b><br><br><b>Education &amp; Workforce</b> | Workforce deficit was identified as the central cross-level cascade driver. Infrastructure, supply chain, and technology investments are underutilized without sufficient trained clinicians to deploy them.         |                                                                                                                                                                                                                                                                                                                                                                                                                                                                                                                                           |
