# Supplementary material
Source: Research Square preprint supplement (doi:10.21203/rs.3.rs-10069933/v1)
Supplement: Supplementary file 2 [file a3b820b6cadde94d65b89b5e.docx]

# Supplementary Table S1. Literature Search Methodology

Search and selection methodology for the targeted literature review conducted to identify gaps in existing methodology and provide a theoretical foundation for the multi-level systems assessment. Three categories were reviewed: barrier documentation in P&O care; health systems assessment frameworks; and implementation science approaches.

| **Category** | **Databases** | **Search Terms** |
| --- | --- | --- |
| **1. Barrier documentation in P&O care** | PubMed, Google Scholar, WHO, USAID, NGO repositories | "prosthetic," "orthotic," "P&O," "barriers," "access," "low-income," "resource-limited," "developing countries," "post-conflict," "fragile states" |
| **2. Health systems assessment frameworks** | PubMed, Google Scholar | "health systems assessment," "facility assessment," "SARA," "Service Provision Assessment," "capacity evaluation," "infrastructure scoring," "WHO Building Blocks" |
| **3. Implementation science approaches** | PubMed, Google Scholar | "barrier interaction," "implementation science," "multi-level," "compounding barriers," "systems thinking," "CFIR," "realist evaluation" |

**Date range:** 2000–2024.

**Language:** English.

**Inclusion criteria:** Peer-reviewed articles and authoritative gray literature focused on P&O care, health systems assessment, rehabilitation access, or implementation science in resource-limited settings. Systematic reviews, framework papers, and methodological contributions prioritized.

**Selection approach:** Non-exhaustive. Retrieval guided by theoretical saturation within each category. Reference lists of key papers reviewed for additional sources.

# Supplementary Table S2. Barrier Interaction Types

The four barrier interaction types identified through SABI analysis, with definitions and Sierra Leone examples. These interaction types reveal why single-level interventions have not produced lasting change, and why integrated, sequenced intervention is required.

| **Type** | **Definition** | **Sierra Leone Example** |
| --- | --- | --- |
| **Vicious cycles** | Feedback loops in which barriers reinforce each other across levels | Infrastructure deficit leads to poor quality devices, which leads to abandonment, which reduces perceived demand, which deprioritizes infrastructure investment, which perpetuates poor quality |
| **Multiplicative effects** | Compound effects substantially greater than the sum of individual barriers | Rural geography, economic poverty, unpredictable service availability, and multi-visit requirement combine to produce access costs substantially greater than the nominal zero charge for devices |
| **Downward cascades** | System-level failures that generate or amplify individual-level barriers | Financing gap generates workforce deficit, which produces an overburdened single clinician, which produces long wait times, which causes service users to abandon the care pathway |
| **Upward masking** | Individual and community barriers that appear demand-side but reflect unaddressed supply-side failures above | Low care-seeking and device abandonment interpreted as low demand; barrier interaction analysis revealed primary driver was infrastructure collapse and workforce absence — upward masking of supply-side failure |

# Supplementary Table S3. Infrastructure Scoring Rubric (0–25 Point Scale)

Infrastructure was assessed across five domains, each scored 0–5 points, for a facility total of 0–25. Scores were assigned based on direct observation, staff interviews, equipment inspection, and review of operational records where available. Data collection methods across all domains: staff interviews, direct observation during site visits, equipment inspection and functionality testing, review of operations logs, photographic documentation, and facility walkthrough with measurements.

**Domain 1: Power Supply (0–5)**

| **Score** | **Criteria** |
| --- | --- |
| **5** | Reliable grid power 20–24 hours/day OR reliable generator with fuel supply |
| **4** | Grid power 16–20 hours/day OR generator with occasional fuel gaps (1–2 days/month) |
| **3** | Grid power 8–16 hours/day OR generator with frequent fuel gaps (3–7 days/month) |
| **2** | Grid power 4–8 hours/day OR generator unreliable (>7 days/month downtime) |
| **1** | Grid power <4 hours/day; no functional generator |
| **0** | No power supply available |

**Domain 2: Water Access (0–5)**

| **Score** | **Criteria** |
| --- | --- |
| **5** | Reliable piped water 20–24 hours/day; adequate pressure for clinical needs |
| **4** | Piped water 16–20 hours/day OR reliable well/borehole with pump |
| **3** | Piped water 8–16 hours/day OR well/borehole with occasional pump failures |
| **2** | Piped water 4–8 hours/day OR unreliable well/borehole; limited storage |
| **1** | Piped water <4 hours/day; no reliable alternative source |
| **0** | No functional water access |

**Domain 3: Workspace Adequacy (0–5)**

| **Score** | **Criteria** |
| --- | --- |
| **5** | Dedicated spaces for assessment, casting, fabrication, fitting, storage; adequate lighting and ventilation |
| **4** | Most functions have dedicated space; generally adequate size and lighting |
| **3** | Limited space separation; some crowding; fabrication and clinical areas partially overlap |
| **2** | Severely limited space; most functions share space; poor lighting; no climate control |
| **1** | Minimal functional space; extreme crowding; inadequate lighting |
| **0** | No functional workspace available |

**Domain 4: Equipment Functionality (0–5)**

| **Score** | **Criteria** |
| --- | --- |
| **5** | >90% of essential equipment operational; regular maintenance; backup tools available |
| **4** | 75–90% of essential equipment operational; some maintenance performed |
| **3** | 50–75% of essential equipment operational; minimal maintenance; workarounds required |
| **2** | 25–50% of essential equipment operational; no maintenance; significant workarounds |
| **1** | <25% of essential equipment operational; makeshift tools used |
| **0** | No functional equipment |

**Domain 5: Safety and Infection Control (0–5)**

| **Score** | **Criteria** |
| --- | --- |
| **5** | Comprehensive safety protocols; adequate PPE available and used; proper ventilation |
| **4** | Most safety protocols present; PPE generally available; acceptable ventilation |
| **3** | Basic safety protocols; PPE available but inconsistently used; limited ventilation |
| **2** | Minimal safety protocols; PPE rarely available; poor ventilation; multiple hazards |
| **1** | No safety protocols; no PPE; dangerous conditions |
| **0** | Unsafe conditions prevent operations |

**Overall Assessment Categories**

| **Total Score** | **Classification** |
| --- | --- |
| **20–25** | Fully operational |
| **15–19** | Operational with limitations |
| **10–14** | Severely constrained |
| **5–9** | Minimally functional |
| **0–4** | Non-operational |

# Supplementary Figure S1. SITE — Domain Selection from MAPS for Sierra Leone

SITE (Supply Chain, Infrastructure, Technology, Education) is the evidence-based P&O strengthening strategy selected from MAPS for Sierra Leone, derived through four-step translation of SABI barrier findings. All four SITE domains are Level 2 (Service Delivery & Clinic). SITE was formalized in the MIT–MOHS Memorandum of Understanding, January 2023–January 2027. The figure is provided as a separate file (Supplementary Figure S1.pdf).

# Supplementary Methods A. Systems Assessment Methodology

## A1. Facility Assessment Overview

Systematic assessment was conducted at all four Ministry of Health and Sanitation (MOHS)-operated P&O facilities across three field visits. Multiple site visits per facility enabled longitudinal observation and validation of findings.

| **Facility** | **Location** | **Population Served** | **Visit Dates** | **Visits** | **Assessed By** |
| --- | --- | --- | --- | --- | --- |
| National Rehabilitation Centre (NRC) | Freetown (Western Province) | Urban/national hub and Western region | Nov–Dec 2021; July 2022; Jan–Mar 2023 | 3 | FRA, DD, AK, NMB, LA, PK, EC |
| Bo Clinic | Bo (Southern Province) | Southern region | Nov–Dec 2021; July 2022; Jan–Mar 2023 | 3 | FRA, DD, AK, NMB, LA, PK, EC |
| Makeni Clinic | Makeni (Northern Province) | Northern region | Nov–Dec 2021; July 2022 | 2 | FRA, DD, AK, NMB, LA, PK |
| Koidu Clinic | Koidu (Eastern Province) | Eastern region | Nov–Dec 2021; July 2022 | 2 | FRA, DD, AK, NMB, LA, PK |

## A2. Equipment and Workforce Assessment

### Equipment Categories Assessed

Comprehensive equipment inventories documented functionality status across eight categories: (1) Measurement and Assessment: measuring tapes, calipers, goniometers, assessment forms; (2) Casting: plaster, casting materials, buckets, water access; (3) Fabrication — Cutting: saws (manual and power), cutting tools, workbenches; (4) Fabrication — Shaping: grinders, sanders, files, rasps, heat guns, ovens; (5) Fabrication — Joining: drills, rivets, adhesives, fasteners, alignment jigs; (6) Materials Storage: shelving, bins, climate control, security; (7) Safety Equipment: dust masks, eye protection, ventilation, first aid; (8) Finishing: paint and coating materials, padding, straps, cosmetic finishing tools.

Equipment was classified as: Operational, Functional with limitations, Non-operational (repairable), Non-operational (beyond repair), or Missing.

### Workforce Capacity Assessment

Workforce assessment documented: staff numbers by training level (Category I, Category II, technicians, support staff); patient-to-provider ratios compared to WHO P&O Standards recommendations; years of experience, supervision availability, and continuing education access; and retention challenges and workforce constraints. WHO benchmark: 5–10 qualified P&O clinicians per million population.

## A3. Photographic Documentation Protocol

Systematic photographic documentation supported infrastructure scoring and provided visual evidence for findings. All photographs were taken with explicit facility permission. Documentation categories included: exterior and facility context; power and water systems; workspace; operational equipment; non-operational equipment; safety and hygiene; device quality examples (de-identified); and supply storage.

*Ethical note: Device photographs showing quality issues are de-identified. No faces or identifying information are included in any documentation.*

## A4. Analysis Approach

Quantitative analysis included: infrastructure scores calculated per facility and domain; equipment functionality percentages by category; workforce-to-population ratios compared to WHO standards; and cross-facility comparison. Qualitative analysis included: thematic coding of field observation notes using the multi-level barrier framework; synthesis of staff perspectives for recurring themes; and categorisation of photographic evidence. Integration: quantitative metrics and qualitative observations were combined to validate findings and provide contextual depth for infrastructure constraints.

## A5. Example Assessment — National Rehabilitation Centre (NRC), Freetown

**Assessment period:** November 2021 — March 2023 (3 visits across Trips 1 and 3)

| **Domain** | **Score** | **Key Observations** |
| --- | --- | --- |
| **Power** | 2/5 | Grid power 4–6 hours/day (variable). Generator present but fuel frequently unavailable due to costs. |
| **Water** | 2/5 | Unreliable well/borehole; limited storage capacity. Frequent hygiene compromises. |
| **Workspace** | 3/5 | Adequate square footage but poor space separation. Fabrication and fitting areas overlap. No climate control; extreme heat during dry season. |
| **Equipment** | 1/5 | <25% of essential equipment operational. Oven unreliable; vacuum former broken. Large collection of non-functional donated equipment past safe-use lifespan. |
| **Safety** | 2/5 | Minimal PPE available. Poor ventilation in fabrication area. No formal safety protocols. Structural concerns including roof leaks. |
| **TOTAL** | **10/25** | **Severely constrained** |

**Workforce:** 1 Category I CPO + 2 technicians serving Sierra Leone's estimated population requiring P&O care. With a population of approximately 8.4 million, this represents a deficit of 40–80 times the WHO minimum benchmark of 5–10 clinicians per million population.

**Service delivery (staff estimates):** New patients approximately 20–30/month; return visits approximately 40–50/month; devices completed approximately 15–20/month (highly variable based on power and supply availability); wait times 2–4 weeks for initial assessment, 4–12 weeks from assessment to device delivery.

# Supplementary Methods B. Interest-holder Consultation Methodology

## B1. Interest-holder Categories and Consultation Formats

Total consultations: n = 90 across three field visits (November 2021 – March 2023). Many interest-holders were engaged across multiple visits as the partnership and program design developed.

| **Interest-holder Category** | **N** | **Primary Topics** | **Consultation Formats** |
| --- | --- | --- | --- |
| **Users or Potential Users of P&O Devices** | 35 | Barriers to access; device quality; economic constraints; stigma; education and employment | Community meetings; Disabled Persons Organizations consultations; private interviews |
| **P&O Clinicians & Rehabilitation Professionals** | 22 | Workforce challenges; training needs; infrastructure constraints; supply chain; quality assurance | Facility-based discussions; technical planning; needs assessment conversations |
| **Healthcare Administrators & Policymakers** | 21 | Policy implementation; budget and financing; health system integration; governance; strategic priorities | Partnership development meetings; policy consultations; strategic planning workshops |
| **NGO & Donor Representatives** | 12 | Coordination; sustainability; international standards adaptation; lessons learned | Coordination meetings; collaborative planning; information sharing |

Geographic distribution spanned Freetown (Western Area), Bo (Southern Province), Makeni (Northern Province), Koidu (Eastern Province), and rural community and camp settings across Bombali, Tonkolili, and Port Loko districts. See Table 1 in the main manuscript for the full consultation breakdown by stakeholder group, setting, and district.

## B2. Consultation Formats

| **Format** | **Duration** | **Participants** | **Documentation** |
| --- | --- | --- | --- |
| **Community meetings** | 1–2 hours | 10–30 PWDs and community members | Field notes; key themes documented; no individual attribution |
| **DPO consultations** | 1–3 hours | DPO leadership and members | Field notes; meeting summaries; aggregate themes |
| **Facility-based discussions** | 30 min–2 hours | Facility staff (1–5) | Field notes integrated with facility assessment documentation |
| **Partnership development meetings** | 1–3 hours | MIT team and MOHS officials (3–10) | Meeting minutes; shared documents; action items |
| **Technical planning workshops** | Half to full day | Multi-interest-holder (10–20) | Workshop reports; participant input synthesis |

## B3. Thematic Analysis Approach

### Deductive Coding Framework

| **Barrier Level** | **Codes Applied** | **Primary Sources** |
| --- | --- | --- |
| **Health System** | Workforce shortage, infrastructure deficits, supply chain, financing, data systems | Provider and administrator consultations, facility assessments |
| **Service Delivery** | Device quality, wait times, provider competencies, technology appropriateness, maintenance access | Provider discussions, PWD consultations, facility observations |
| **Individual/Community** | Economic barriers, geographic access, awareness gaps, stigma, cultural attitudes | PWD consultations, community meetings, DPO input |
| **Policy/Environmental** | Policy gaps, governance, coordination, donor dependency, sustainability | Administrator meetings, NGO consultations, partnership meetings |

### Inductive Themes

Context-specific themes emerged that enriched the predetermined framework, including: post-conflict trauma and trust deficits affecting healthcare utilization; Ebola legacy effects including fear of healthcare facilities and concerns about physical contact during device fitting; youth with disabilities facing education exclusion as a barrier to P&O care pathways; cultural manifestations of stigma including concealment of disability; community perceptions that externally produced devices were superior to locally produced ones; and questions of representativeness within DPO leadership structures.

### Interest-holder Priorities and Solutions

| **Interest-holder Group** | **Top Barriers Emphasized** | **Top Solutions Proposed** |
| --- | --- | --- |
| **PWDs** | Device cost; device quality and durability; wait times; distance and transportation; stigma | Free or subsidized care; higher quality materials; faster service; mobile clinics; community awareness |
| **P&O Clinicians** | Workforce shortage; infrastructure (power, equipment); supply chain unreliability; lack of supervision | More trained staff; equipment repair and replacement; reliable supply procurement; continuing education |
| **Administrators & Policymakers** | Budget limitations; workforce shortage; health system integration; donor dependency | Increased government allocation; sustainable financing; local workforce development; stronger governance |
| **NGOs & Donors** | Lack of coordination; sustainability concerns; weak local capacity | Improved coordination; investment in local capacity; government ownership; regional training hubs |

## B4. Example Consultation Summary — P&O Clinicians Meeting, NRC Freetown

**Date:** November 2021 **Location:** National Rehabilitation Centre, Freetown **Duration:** 2.5 hours

**Participants:** 4 P&O clinicians currently working at NRC; 1 administrative staff member; 3 MIT researchers

**Context:** Meeting to understand challenges NRC faces in providing P&O care adequately to patient population; gather input on priorities for P&O system strengthening; discuss clinicians' role in future program.

### Key Barriers Emphasized

Participants emphasized six primary barriers: workforce shortage; training gaps and limited access to continuing education; supply chain failures and component unavailability; equipment and machine non-functionality; infrastructure constraints; and lack of coordination across the sector.

### Solutions and Priorities

Solutions identified by participants fell into three domains, listed in order of emphasis: first, investment in education and formal training pathways for P&O professionals; second, reliable and sufficient supply of consumables and components; third, restoration of equipment, machine, and clinic functionality as a prerequisite for consistent service delivery. The group's framing of priorities was notable: participants oriented consistently toward system repair rather than patient throughput, articulating the view that addressing structural conditions must precede expansion of care. This priority ordering aligned with and informed the SITE strategy's selection logic.

### Points of Consensus and Divergence

Consensus: Participants were in strong agreement on the primary barriers, the urgency of addressing infrastructure and supply chain deficits, and the importance of education and workforce development as long-term solutions. There was also consensus that the field had historically prioritized device provision over system-building — a pattern that, despite the genuine value of that provision, had not yet accumulated into durable system capacity.

Divergence: One area of divergence concerned workforce retention and recruitment. Several clinicians noted that P&O professional salaries in Sierra Leone are insufficient to attract or retain qualified staff. This raised a boundary question: salary and employment conditions fall primarily within MOHS jurisdiction, while training and supply chain support fall more naturally within MIT's scope. Participants also expressed frustration that external NGO partners have historically provided what they determined to be needed rather than responding to what was specifically requested — a pattern that had eroded trust in external partnerships over time.

### Observer Reflections

The meeting revealed a group of clinicians with clear, consistent, and sophisticated analysis of their own system's constraints, one that aligned closely with the SABI framework findings documented in the main paper. Their framing of the problem as structural rather than operational suggested that the interest-holder community was prepared for a system-strengthening approach and would be receptive to a partnership oriented around it.

The salary divergence surfaced an important jurisdictional boundary that would require explicit management throughout the partnership: MIT's scope of influence extends to supply chain, education, infrastructure improvement, and technology, while employment conditions and salary structures are sovereign MOHS responsibilities. The SITE strategy was designed with this boundary in mind.

The frustration expressed regarding NGO prioritization patterns was a recurring theme across multiple consultation contexts during the pre-implementation period, underscoring the importance of the participatory co-design approach taken in the MIT–MOHS partnership.
